# Supplementary material for: An Integrated Method of Supply Chains Vulnerability Assessment
Source: Hindawi journal article supplement (doi:10.1155/2016/2819238), 2016-01-01
Supplement: f1 [file 2819238.f1.doc]

**Appendix and calculation tables**

Appendix A：Expert scoring table

Table A1 Expert scoring table of failure mode

| First-level factors | Second-level factors | Failure mode | Severity | Occurrence | Detection | Note |
| --- | --- | --- | --- | --- | --- | --- |
| Plan | Strategy | Plan deviation |  |  |  |  |
| Inconsistent strategic objectives among supply chain members |  |  |  |  |
| Culture | Culture difference |  |  |  |  |
| Low quality of the staff cultural skills |  |  |  |  |
| Demand | Customer loss |  |  |  |  |
| Balance of supply and demand |  |  |  |  |
| Environment | Industrial policy constraints |  |  |  |  |
| Insufficient in public utilities supply |  |  |  |  |
| Macroeconomic fluctuation |  |  |  |  |
| Natural disasters etc. |  |  |  |  |
| Source | Purchasing | High purchasing price |  |  |  |  |
| Low quality of procurement product |  |  |  |  |
| Supply | Supplier number |  |  |  |  |
| Delivery delay |  |  |  |  |
| Make | Production | Improper control of the production process |  |  |  |  |
| Technical level restrictions |  |  |  |  |
| Excess capacity |  |  |  |  |
| Control | Labor cost Rising |  |  |  |  |
| Excessive target node |  |  |  |  |
| Imperfect job security system |  |  |  |  |
| Deliver | Relation | Self-interested behavior of partners |  |  |  |  |
| Inequitable benefits distribution among partners |  |  |  |  |
| Trading | Delivery tardiness |  |  |  |  |
| Performance risk |  |  |  |  |
| Changes in ship price |  |  |  |  |
| Return | Return management | Contract renegotiation |  |  |  |  |
| Ship-owner withdrawal |  |  |  |  |

Note: For the "severity" "occurrence" "detection" three items, you can select one of {VH, H , LH, M, LL, L, VL} to fill in the table.

Table A2 Scoring table of index weight

| First-level factors | Weight | Second-level factors | Weight | Third-level factors | Weight | Severity weight | Occurrence weight | Detection weight |
| --- | --- | --- | --- | --- | --- | --- | --- | --- |
| Plan  *P* |  | Strategy *P1* |  | Plan deviation *P1F1* |  |  |  |  |
| Inconsistent strategic objectives among supply chain members *P1F2* |  |  |  |  |
| Culture *P2* |  | Culture difference *P2F1* |  |  |  |  |
| Low quality of the staff cultural skills *P2F2* |  |  |  |  |
| Demand *P3* |  | Customer loss*P3F1* |  |  |  |  |
| Balance of supply and demand *P3F2* |  |  |  |  |
| Environment *P4* |  | Industrial policy constraints *P4F1* |  |  |  |  |
| Insufficient in public utilities supply *P4F2* |  |  |  |  |
| Macroeconomic fluctuation *P4F3* |  |  |  |  |
| Natural disasters etc.*P4F5* |  |  |  |  |
| Source  *S* |  | Purchaing *S1* |  | High purchasing price *S1F1* |  |  |  |  |
| Low quality of procurement product *S1F2* |  |  |  |  |
| Supply *S2* |  | Supplier number *S2F1* |  |  |  |  |
| Delivery delay *S2F2* |  |  |  |  |
| Make  *M* |  | Production *M1* |  | Improper control of the production process *M1F1* |  |  |  |  |
| Technical level restrictions *M1F2* |  |  |  |  |
| Excess capacity *M1F3* |  |  |  |  |
| Control *M2* |  | Labor cost Rising *M2F1* |  |  |  |  |
| Excessive target node *M2F2* |  |  |  |  |
| Imperfect job security system *M2F3* |  |  |  |  |
| Deliver  *D* |  | Relation *D1* |  | Self-interested behavior of partners *D1F1* |  |  |  |  |
| Inequitable benefits distribution among partners *D1F2* |  |  |  |  |
| Trading *D2* |  | Delivery tardiness *D2F1* |  |  |  |  |
| Performance risk *D2F2* |  |  |  |  |
| Changes in ship price *D2F3* |  |  |  |  |
| Return  *R* |  | Return management *R1* |  | Contract renegotiation *R1F1* |  |  |  |  |
| Ship-owner withdrawal *R1F2* |  |  |  |  |

Note: The score of weights for each factor each expert scoring ranges from 0 to 1. Besides, the sum of the weigh of all the factors in one process should equal to 1. For example, when expert E scoring, the weight of factor P ranges from 0 to 1; the total weight of P, S, M, D, R five factors is equal to 1, and the total weight of *P1F1*、*P1F2* is equal to 1 is equal to 1. The corresponding severity weight, occurrence weight and detection weight of each third-level factor sum to 1. Score represents by an integer or a decimal.

**Appendix B：summary table**

Table B1 Summary table of expert scoring （Group1）

| Factors | *S* | | | | | *O* | | | | | *D* | | | | |
| --- | --- | --- | --- | --- | --- | --- | --- | --- | --- | --- | --- | --- | --- | --- | --- |
| 1 | 2 | 3 | 4 | 5 | 1 | 2 | 3 | 4 | 5 | 1 | 2 | 3 | 4 | 5 |
| *P1F1* | *VH* | *LH* | *L* | *VH* | *VL* | *VL* | *LL* | *L* | *LL* | *M* | *L* | *L* | *H* | *VH* | *LL* |
| *P1F2* | *H* | *M* | *M* | *H* | *M* | *L* | *LL* | *H* | *M* | *M* | *LL* | *VL* | *VH* | *H* | *H* |
| *P2F1* | *LH* | *H* | *H* | *LH* | *VL* | *M* | *M* | *M* | *M* | *VL* | *L* | *L* | *VH* | *L* | *VL* |
| *P2F2* | *M* | *M* | *L* | *LL* | *LH* | *M* | *LL* | *L* | *H* | *VH* | *L* | *LL* | *L* | *LH* | *LL* |
| *P3F1* | *H* | *M* | *H* | *H* | *H* | *H* | *LH* | *H* | *LH* | *M* | *VL* | *L* | *L* | *M* | *VL* |
| *P3F2* | *LL* | *L* | *H* | *H* | *H* | *M* | *LL* | *H* | *H* | *H* | *L* | *LL* | *L* | *H* | *VL* |
| *P4F1* | *L* | *H* | *VH* | *LH* | *VL* | *M* | *L* | *H* | *LH* | *VL* | *M* | *L* | *L* | *M* | *VL* |
| *P4F2* | *L* | *LL* | *H* | *M* | *LL* | *M* | *LL* | *H* | *LH* | *H* | *M* | *LH* | *L* | *M* | *L* |
| *P4F3* | *M* | *H* | *H* | *LH* | *VH* | *L* | *LH* | *H* | *LH* | *VL* | *L* | *L* | *H* | *LH* | *LL* |
| *P4F4* | *L* | *H* | *M* | *H* | *VL* | *L* | *VH* | *M* | *L* | *VL* | *VL* | *VL* | *H* | *L* | *VL* |
| *S1F1* | *L* | *LH* | *H* | *LH* | *LH* | *L* | *H* | *H* | *L* | *VH* | *L* | *LL* | *VH* | *LL* | *VL* |
| *S1F2* | *M* | *M* | *M* | *LH* | *VH* | *LL* | *LL* | *M* | *LL* | *VH* | *M* | *L* | *M* | *LL* | *VL* |
| *S2F1* | *L* | *LH* | *H* | *LH* | *M* | *LL* | *M* | *H* | *LH* | *L* | *L* | *M* | *H* | *LH* | *LL* |
| *S2F2* | *LL* | *H* | *H* | *LH* | *LL* | *L* | *LH* | *LH* | *LL* | *M* | *L* | *L* | *L* | *LH* | *VH* |
| *M1F1* | *M* | *LH* | *VH* | *LH* | *VH* | *M* | *M* | *LH* | *H* | *VH* | *M* | *M* | *LH* | *LH* | *VL* |
| *M1F2* | *L* | *LH* | *VH* | *H* | *VH* | *M* | *LL* | *VH* | *L* | *VH* | *M* | *M* | *VL* | *LH* | *L* |
| *M1F3* | *H* | *H* | *VH* | *LH* | *VH* | *M* | *VH* | *VH* | *LL* | *VH* | *L* | *VL* | *VH* | *LL* | *L* |
| *M2F1* | *H* | *VH* | *H* | *LH* | *LH* | *H* | *LH* | *M* | *LL* | *VL* | *L* | *L* | *L* | *L* | *VL* |
| *M2F2* | *M* | *H* | *H* | *LL* | *VH* | *M* | *M* | *M* | *LH* | *VH* | *L* | *L* | *M* | *LH* | *VL* |
| *M2F3* | *L* | *L* | *H* | *LL* | *VH* | *H* | *LH* | *H* | *M* | *VH* | *M* | *L* | *M* | *H* | *LL* |
| *D1F1* | *M* | *VL* | *L* | *M* | *VH* | *VH* | *L* | *L* | *H* | *H* | *H* | *H* | *H* | *M* | *VH* |
| *D1F2* | *L* | *LH* | *H* | *M* | *LL* | *VH* | *LH* | *L* | *LH* | *VH* | *H* | *M* | *H* | *LL* | *VL* |
| *D2F1* | *M* | *H* | *H* | *H* | *H* | *M* | *LH* | *H* | *LL* | *LL* | *L* | *L* | *H* | *LL* | *LH* |
| *D2F2* | *M* | *LL* | *L* | *H* | *L* | *L* | *M* | *VL* | *LL* | *M* | *VH* | *VL* | *L* | *LL* | *VL* |
| *D2F3* | *L* | *L* | *L* | *H* | *VL* | *H* | *LL* | *L* | *LL* | *LH* | *L* | *L* | *L* | *L* | *M* |
| *R1F1* | *M* | *L* | *L* | *H* | *LH* | *M* | *VL* | *L* | *L* | *L* | *VH* | *VL* | *H* | *L* | *L* |
| *R1F2* | *VH* | *H* | *L* | *H* | *VH* | *M* | *M* | *L* | *L* | *VL* | *H* | *L* | *H* | *L* | *VL* |

Table B2 Summary table of expert scoring （Group2）

| Factors | *S* | | | | | *O* | | | | | *D* | | | | |
| --- | --- | --- | --- | --- | --- | --- | --- | --- | --- | --- | --- | --- | --- | --- | --- |
| 1 | 2 | 3 | 4 | 5 | 1 | 2 | 3 | 4 | 5 | 1 | 2 | 3 | 4 | 5 |
| *P1F1* | LH | LL | H | VH | H | LL | L | LH | LH | LL | LH | LH | LL | LH | LH |
| *P1F2* | LL | LL | LH | VH | LH | LL | L | M | H | L | LL | M | LL | M | M |
| *P2F1* | M | L | M | LH | LL | LL | LL | LL | LH | LL | LL | L | LH | H | M |
| *P2F2* | M | M | LH | LH | LL | LL | LL | LL | M | M | LL | L | L | LH | M |
| *P3F1* | H | H | LH | H | H | M | LL | LL | LH | M | L | L | L | LH | LH |
| *P3F2* | LL | LH | M | H | LH | LL | M | LL | M | LL | L | LL | LL | LH | LH |
| *P4F1* | M | LH | M | H | LH | LL | L | M | H | M | L | LL | LL | H | LH |
| *P4F2* | M | M | LH | H | LH | M | L | LL | LH | M | L | LH | M | H | M |
| *P4F3* | LL | H | H | H | LH | L | LL | VL | LH | M | L | H | VH | LL | M |
| *P4F4* | LL | LH | VH | VH | M | L | L | VL | L | LL | LL | VH | VH | VL | LH |
| *S1F1* | M | LH | M | LH | LH | M | LL | LL | LH | M | VL | VL | L | H | LH |
| *S1F2* | M | H | LH | H | H | LL | L | LH | LH | LL | VL | VL | L | LH | H |
| *S2F1* | M | M | M | H | LH | L | L | LL | H | M | VL | VL | LL | M | H |
| *S2F2* | M | LH | M | VH | H | L | LL | M | LL | LL | L | VL | L | LL | LH |
| *M1F1* | LH | LL | M | LH | LH | LH | L | M | M | M | L | L | L | H | LH |
| *M1F2* | M | H | L | LH | LH | LL | L | M | LH | M | L | VL | L | LL | M |
| *M1F3* | M | LH | LL | LH | M | LL | L | M | H | M | L | VL | LL | H | LH |
| *M2F1* | M | M | M | LH | LH | M | LL | M | LH | LH | L | L | L | H | LH |
| *M2F2* | M | M | LL | H | LH | LL | LL | L | LH | M | L | L | L | LH | LH |
| *M2F3* | LH | M | LH | H | M | H | L | L | M | L | VL | VL | L | LH | H |
| *D1F1* | LH | LH | M | M | LH | H | L | M | LH | M | LH | LL | M | L | LH |
| *D1F2* | H | LH | M | LH | M | LH | L | M | H | M | LH | L | LL | L | LL |
| *D2F1* | H | LH | LH | H | LH | H | L | M | H | M | H | LL | L | LH | LH |
| *D2F2* | M | H | H | M | LH | LH | VL | LL | LH | L | H | LH | LH | LL | LH |
| *D2F3* | M | LH | LL | M | M | M | LL | LH | L | LL | 8 | LL | LL | LL | LH |
| *R1F1* | H | LH | M | M | LH | M | VL | M | LL | L | LH | LH | LL | M | LH |
| *R1F2* | H | H | H | H | LH | H | VL | LL | LL | L | M | LH | M | L | LH |

Table B3 Decision-making factors set（Group1）

| Factors | *S* | | | | | Average *S* | *O* | | | | | Average *O* | *D* | | | | | Average *D* |
| --- | --- | --- | --- | --- | --- | --- | --- | --- | --- | --- | --- | --- | --- | --- | --- | --- | --- | --- |
| 1 | 2 | 3 | 4 | 5 | 1 | 2 | 3 | 4 | 5 | 1 | 2 | 3 | 4 | 5 |
| *P1F1* | 9.8 | 6.9 | 2.3 | 9.8 | 1.3 | 6.9 | 1.3 | 4.5 | 2.3 | 4.5 | 5.7 | 3.2 | 2.3 | 2.3 | 9 | 9.8 | 4.5 | 5.4 |
| *P1F2* | 9 | 5.7 | 5.7 | 9 | 5.7 | 7.4 | 2.3 | 4.5 | 9 | 5.7 | 5.7 | 5.1 | 4.5 | 1.3 | 9.8 | 9 | 9 | 6.3 |
| *P2F1* | 6.9 | 9 | 9 | 6.9 | 1.3 | 7.2 | 5.7 | 5.7 | 5.7 | 5.7 | 1.3 | 5.3 | 2.3 | 2.3 | 9.8 | 2.3 | 1.3 | 3.7 |
| *P2F2* | 5.7 | 5.7 | 2.3 | 4.5 | 6.9 | 4.9 | 5.7 | 4.5 | 2.3 | 9 | 9.8 | 5.9 | 2.3 | 4.5 | 2.3 | 6.9 | 4.5 | 3.9 |
| *P3F1* | 9 | 5.7 | 9 | 9 | 9 | 8.3 | 9 | 6.9 | 9 | 6.9 | 5.7 | 7.8 | 1.3 | 2.3 | 2.3 | 5.7 | 1.3 | 2.6 |
| *P3F2* | 4.5 | 2.3 | 9 | 9 | 9 | 6.3 | 5.7 | 4.5 | 9 | 9 | 9 | 7.1 | 2.3 | 4.5 | 2.3 | 9 | 1.3 | 4.0 |
| *P4F1* | 2.3 | 9 | 9.8 | 6.9 | 1.3 | 6.0 | 5.7 | 2.3 | 9 | 6.9 | 1.3 | 5.5 | 5.7 | 2.3 | 2.3 | 5.7 | 1.3 | 3.9 |
| *P4F2* | 2.3 | 4.5 | 9 | 5.7 | 4.5 | 5.0 | 5.7 | 4.5 | 9 | 6.9 | 9 | 6.7 | 5.7 | 6.9 | 2.3 | 5.7 | 2.3 | 4.9 |
| *P4F3* | 5.7 | 9 | 9 | 6.9 | 9.8 | 7.7 | 2.3 | 6.9 | 9 | 6.9 | 1.3 | 5.4 | 2.3 | 2.3 | 9 | 6.9 | 4.5 | 4.8 |
| *P4F4* | 2.3 | 9 | 5.7 | 9 | 1.3 | 5.6 | 2.3 | 9.8 | 5.7 | 2.3 | 1.3 | 4.4 | 1.3 | 1.3 | 9 | 2.3 | 1.3 | 3.0 |
| *S1F1* | 2.3 | 6.9 | 9 | 6.9 | 6.9 | 5.9 | 2.3 | 9 | 9 | 2.3 | 9.8 | 5.7 | 2.3 | 4.5 | 9.8 | 4.5 | 1.3 | 4.6 |
| *S1F2* | 5.7 | 5.7 | 5.7 | 6.9 | 9.8 | 6.4 | 4.5 | 4.5 | 5.7 | 4.5 | 9.8 | 5.3 | 5.7 | 2.3 | 5.7 | 4.5 | 1.3 | 4.3 |
| *S2F1* | 2.3 | 6.9 | 9 | 6.9 | 5.7 | 5.8 | 4.5 | 5.7 | 9 | 6.9 | 2.3 | 5.9 | 2.3 | 5.7 | 9 | 6.9 | 4.5 | 5.5 |
| *S2F2* | 4.5 | 9 | 9 | 6.9 | 4.5 | 6.8 | 2.3 | 6.9 | 6.9 | 4.5 | 5.7 | 4.9 | 2.3 | 2.3 | 2.3 | 6.9 | 9.8 | 4.0 |
| *M1F1* | 5.7 | 6.9 | 9.8 | 6.9 | 9.8 | 7.4 | 5.7 | 5.7 | 6.9 | 9 | 9.8 | 7.0 | 5.7 | 5.7 | 6.9 | 6.9 | 1.3 | 5.7 |
| *M1F2* | 2.3 | 6.9 | 9.8 | 9 | 9.8 | 6.8 | 5.7 | 4.5 | 9.8 | 2.3 | 9.8 | 6.0 | 5.7 | 5.7 | 1.3 | 6.9 | 2.3 | 4.7 |
| *M1F3* | 9 | 9 | 9.8 | 6.9 | 9.8 | 8.8 | 5.7 | 9.8 | 9.8 | 4.5 | 9.8 | 7.5 | 2.3 | 1.3 | 9.8 | 4.5 | 2.3 | 4.0 |
| *M2F1* | 9 | 9.8 | 9 | 6.9 | 6.9 | 8.5 | 9 | 6.9 | 5.7 | 4.5 | 1.3 | 6.3 | 2.3 | 2.3 | 2.3 | 2.3 | 1.3 | 2.2 |
| *M2F2* | 5.7 | 9 | 9 | 4.5 | 9.8 | 7.2 | 5.7 | 5.7 | 5.7 | 6.9 | 9.8 | 6.4 | 2.3 | 2.3 | 5.7 | 6.9 | 1.3 | 3.8 |
| *M2F3* | 2.3 | 2.3 | 9 | 4.5 | 9.8 | 4.8 | 9 | 6.9 | 9 | 5.7 | 9.8 | 8.0 | 5.7 | 2.3 | 5.7 | 9 | 4.5 | 5.6 |
| *D1F1* | 5.7 | 1.3 | 2.3 | 5.7 | 9.8 | 4.6 | 9.8 | 2.3 | 2.3 | 9 | 9 | 6.6 | 9 | 9 | 9 | 5.7 | 9.8 | 8.4 |
| *D1F2* | 2.3 | 6.9 | 9 | 5.7 | 4.5 | 5.5 | 9.8 | 6.9 | 2.3 | 6.9 | 9.8 | 7.1 | 9 | 5.7 | 9 | 4.5 | 1.3 | 6.7 |
| *D2F1* | 5.7 | 9 | 9 | 9 | 9 | 8.0 | 5.7 | 6.9 | 9 | 4.5 | 4.5 | 6.2 | 2.3 | 2.3 | 9 | 4.5 | 6.9 | 4.5 |
| *D2F2* | 5.7 | 4.5 | 2.3 | 9 | 2.3 | 5.1 | 2.3 | 5.7 | 1.3 | 4.5 | 5.7 | 3.6 | 9.8 | 1.3 | 2.3 | 4.5 | 1.3 | 4.7 |
| *D2F3* | 2.3 | 2.3 | 2.3 | 9 | 1.3 | 3.5 | 9 | 4.5 | 2.3 | 4.5 | 6.9 | 5.7 | 2.3 | 2.3 | 2.3 | 2.3 | 5.7 | 2.6 |
| *R1F1* | 5.7 | 2.3 | 2.3 | 9 | 6.9 | 5.1 | 5.7 | 1.3 | 2.3 | 2.3 | 2.3 | 3.1 | 9.8 | 1.3 | 9 | 2.3 | 2.3 | 5.7 |
| *R1F2* | 9.8 | 9 | 2.3 | 9 | 9.8 | 8.0 | 5.7 | 5.7 | 2.3 | 2.3 | 1.3 | 3.9 | 9 | 2.3 | 9 | 2.3 | 1.3 | 5.6 |

Table B4 Decision-making factors set（Group2）

| Factors | *S* | | | | | Average S | *O* | | | | | Average O | *D* | | | | | Average D |
| --- | --- | --- | --- | --- | --- | --- | --- | --- | --- | --- | --- | --- | --- | --- | --- | --- | --- | --- |
| 1 | 2 | 3 | 4 | 5 | 1 | 2 | 3 | 4 | 5 | 1 | 2 | 3 | 4 | 5 |
| *P1F1* | 6.9 | 4.5 | 9 | 9.8 | 9 | 7.8 | 4.5 | 2.3 | 6.9 | 6.9 | 4.5 | 5.0 | 6.9 | 6.9 | 4.5 | 6.9 | 6.9 | 6.4 |
| *P1F2* | 4.5 | 4.5 | 6.9 | 9.8 | 6.9 | 6.5 | 4.5 | 2.3 | 5.7 | 9 | 2.3 | 4.8 | 4.5 | 5.7 | 4.5 | 5.7 | 5.7 | 5.2 |
| *P2F1* | 5.7 | 2.3 | 5.7 | 6.9 | 4.5 | 5.0 | 4.5 | 4.5 | 4.5 | 6.9 | 4.5 | 5.0 | 4.5 | 2.3 | 6.9 | 9 | 5.7 | 5.7 |
| *P2F2* | 5.7 | 5.7 | 6.9 | 6.9 | 4.5 | 5.9 | 4.5 | 4.5 | 4.5 | 5.7 | 5.7 | 5.0 | 4.5 | 2.3 | 2.3 | 6.9 | 5.7 | 4.3 |
| *P3F1* | 9 | 9 | 6.9 | 9 | 9 | 8.6 | 5.7 | 4.5 | 4.5 | 6.9 | 5.7 | 5.5 | 2.3 | 2.3 | 2.3 | 6.9 | 6.9 | 4.1 |
| *P3F2* | 4.5 | 6.9 | 5.7 | 9 | 6.9 | 6.6 | 4.5 | 5.7 | 4.5 | 5.7 | 4.5 | 5.0 | 2.3 | 4.5 | 4.5 | 6.9 | 6.9 | 5.0 |
| *P4F1* | 5.7 | 6.9 | 5.7 | 9 | 6.9 | 6.8 | 4.5 | 2.3 | 5.7 | 9 | 5.7 | 5.4 | 2.3 | 4.5 | 4.5 | 9 | 6.9 | 5.4 |
| *P4F2* | 5.7 | 5.7 | 6.9 | 9 | 6.9 | 6.8 | 5.7 | 2.3 | 4.5 | 6.9 | 5.7 | 5.0 | 2.3 | 6.9 | 5.7 | 9 | 5.7 | 5.9 |
| *P4F3* | 4.5 | 9 | 9 | 9 | 6.9 | 7.7 | 2.3 | 4.5 | 1.3 | 6.9 | 5.7 | 4.1 | 2.3 | 9 | 9.8 | 4.5 | 5.7 | 6.3 |
| *P4F4* | 4.5 | 6.9 | 9.8 | 9.8 | 5.7 | 7.3 | 2.3 | 2.3 | 1.3 | 2.3 | 4.5 | 2.5 | 4.5 | 9.8 | 9.8 | 1.3 | 6.9 | 6.5 |
| *S1F1* | 5.7 | 6.9 | 5.7 | 6.9 | 6.9 | 6.4 | 5.7 | 4.5 | 4.5 | 6.9 | 5.7 | 5.5 | 1.3 | 1.3 | 2.3 | 9 | 6.9 | 4.2 |
| *S1F2* | 5.7 | 9 | 6.9 | 9 | 9 | 7.9 | 4.5 | 2.3 | 6.9 | 6.9 | 4.5 | 5.0 | 1.3 | 1.3 | 2.3 | 6.9 | 9 | 4.2 |
| *S2F1* | 5.7 | 5.7 | 5.7 | 9 | 6.9 | 6.6 | 2.3 | 2.3 | 4.5 | 9 | 5.7 | 4.8 | 1.3 | 1.3 | 4.5 | 5.7 | 9 | 4.4 |
| *S2F2* | 5.7 | 6.9 | 5.7 | 9.8 | 9 | 7.4 | 2.3 | 4.5 | 5.7 | 4.5 | 4.5 | 4.3 | 2.3 | 1.3 | 2.3 | 4.5 | 6.9 | 3.5 |
| *M1F1* | 6.9 | 4.5 | 5.7 | 6.9 | 6.9 | 6.2 | 6.9 | 2.3 | 5.7 | 5.7 | 5.7 | 5.3 | 2.3 | 2.3 | 2.3 | 9 | 6.9 | 4.6 |
| *M1F2* | 5.7 | 9 | 2.3 | 6.9 | 6.9 | 6.2 | 4.5 | 2.3 | 5.7 | 6.9 | 5.7 | 5.0 | 2.3 | 1.3 | 2.3 | 4.5 | 5.7 | 3.2 |
| *M1F3* | 5.7 | 6.9 | 4.5 | 6.9 | 5.7 | 5.9 | 4.5 | 2.3 | 5.7 | 9 | 5.7 | 5.4 | 2.3 | 1.3 | 4.5 | 9 | 6.9 | 4.8 |
| *M2F1* | 5.7 | 5.7 | 5.7 | 6.9 | 6.9 | 6.2 | 5.7 | 4.5 | 5.7 | 6.9 | 6.9 | 5.9 | 2.3 | 2.3 | 2.3 | 9 | 6.9 | 4.6 |
| *M2F2* | 5.7 | 5.7 | 4.5 | 9 | 6.9 | 6.4 | 4.5 | 4.5 | 2.3 | 6.9 | 5.7 | 4.8 | 2.3 | 2.3 | 2.3 | 6.9 | 6.9 | 4.1 |
| *M2F3* | 6.9 | 5.7 | 6.9 | 9 | 5.7 | 6.8 | 9 | 2.3 | 2.3 | 5.7 | 2.3 | 4.3 | 1.3 | 1.3 | 2.3 | 6.9 | 9 | 4.2 |
| *D1F1* | 6.9 | 6.9 | 5.7 | 5.7 | 6.9 | 6.4 | 9 | 2.3 | 5.7 | 6.9 | 5.7 | 5.9 | 6.9 | 4.5 | 5.7 | 2.3 | 6.9 | 5.3 |
| *D1F2* | 9 | 6.9 | 5.7 | 6.9 | 5.7 | 6.8 | 6.9 | 2.3 | 5.7 | 9 | 5.7 | 5.9 | 6.9 | 2.3 | 4.5 | 2.3 | 4.5 | 4.1 |
| *D2F1* | 9 | 6.9 | 6.9 | 9 | 6.9 | 7.7 | 9 | 2.3 | 5.7 | 9 | 5.7 | 6.3 | 9 | 4.5 | 2.3 | 6.9 | 6.9 | 5.9 |
| *D2F2* | 5.7 | 9 | 9 | 5.7 | 6.9 | 7.3 | 6.9 | 1.3 | 4.5 | 6.9 | 2.3 | 4.4 | 9 | 6.9 | 6.9 | 4.5 | 6.9 | 6.8 |
| *D2F3* | 5.7 | 6.9 | 4.5 | 5.7 | 5.7 | 5.7 | 5.7 | 4.5 | 6.9 | 2.3 | 4.5 | 4.8 | 8 | 4.5 | 4.5 | 4.5 | 6.9 | 5.7 |
| *R1F1* | 9 | 6.9 | 5.7 | 5.7 | 6.9 | 6.8 | 5.7 | 1.3 | 5.7 | 4.5 | 2.3 | 3.9 | 6.9 | 6.9 | 4.5 | 5.7 | 6.9 | 6.2 |
| *R1F2* | 9 | 9 | 9 | 9 | 6.9 | 8.6 | 9 | 1.3 | 4.5 | 4.5 | 2.3 | 4.3 | 5.7 | 6.9 | 5.7 | 2.3 | 6.9 | 5.5 |

Table B5 Index weight set of ship-making supply chain vulnerability（Group1）

| First-level factors | Weight | Second-level factors | Weight | Third-level factors | Weight | Severity weight | Occurrence weight | Detection weight |  |
| --- | --- | --- | --- | --- | --- | --- | --- | --- | --- |
| Plan  *P* | 0.2 | Strategy *P1* | 0.34 | Plan deviation *P1F1* | 0.52 | 0.53 | 0.15 | 0.32 | 0.04 |
| Inconsistent strategic objectives among supply chain members *P1F2* | 0.48 | 0.21 | 0.39 | 0.40 | 0.03 |
| Culture *P2* | 0.20 | Culture difference*P2F1* | 0.49 | 0.41 | 0.34 | 0.25 | 0.02 |
| Low quality of the staff cultural skills *P2F2* | 0.51 | 0.24 | 0.45 | 0.31 | 0.02 |
| Demand *P3* | 0.22 | Customer loss*P3F1* | 0.48 | 0.42 | 0.45 | 0.13 | 0.02 |
| Balance of supply and demand *P3F2* | 0.52 | 0.47 | 0.4 | 0.13 | 0.02 |
| Environment *P4* | 0.24 | Industrial policy constraints *P4F1* | 0.40 | 0.34 | 0.42 | 0.24 | 0.02 |
| Insufficient in public utilities supply *P4F2* | 0.13 | 0.48 | 0.32 | 0.2 | 0.01 |
| Macroeconomic fluctuation *P4F3* | 0.16 | 0.46 | 0.25 | 0.29 | 0.01 |
| Natural disasters etc.*P4F5* | 0.31 | 0.67 | 0.14 | 0.19 | 0.01 |
| Source  *S* | 0.24 | Purchasing *S1* | 0.52 | High purchasing price*S1F1* | 0.57 | 0.43 | 0.44 | 0.13 | 0.07 |
| Low quality of procurement product *S1F2* | 0.43 | 0.50 | 0.41 | 0.09 | 0.05 |
| Supply *S2* | 0.48 | Supplier number *S2F1* | 0.66 | 0.43 | 0.32 | 0.25 | 0.08 |
| Delivery delay *S2F2* | 0.34 | 0.52 | 0.34 | 0.14 | 0.04 |
| Make  *M* | 0.28 | Production *M1* | 0.6 | Improper control of the production process *M1F1* | 0.34 | 0.35 | 0.35 | 0.3 | 0.05 |
| Technical level restrictions *M1F2* | 0.32 | 0.35 | 0.32 | 0.33 | 0.06 |
| Excess capacity *M1F3* | 0.34 | 0.42 | 0.3 | 0.28 | 0.06 |
| Control *M2* | 0.4 | Labor cost Rising  *M2F1* | 0.41 | 0.44 | 0.37 | 0.19 | 0.05 |
| Excessive target node *M2F2* | 0.34 | 0.35 | 0.41 | 0.24 | 0.04 |
| Imperfect job security system *M2F3* | 0.25 | 0.41 | 0.26 | 0.33 | 0.03 |
| Deliver  *D* | 0.1 | Relation *D1* | 0.48 | Self-interested behavior of partners *D1F1* | 0.42 | 0.34 | 0.32 | 0.34 | 0.02 |
| Inequitable benefits distribution among partners *D1F2* | 0.58 | 0.31 | 0.4 | 0.29 | 0.03 |
| Trading *D2* | 0.52 | Delivery tardiness *D2F1* | 0.33 | 0.3 | 0.39 | 0.31 | 0.02 |
| Performance risk *D2F2* | 0.27 | 0.41 | 0.33 | 0.26 | 0.01 |
| Changes in ship price *D2F3* | 0.40 | 0.45 | 0.37 | 0.18 | 0.02 |
| Return  *R* | 0.18 | Return management*R1* | 1.0 | Contract renegotiation *R1F1* | 0.5 | 0.34 | 0.3 | 0.36 | 0.09 |
| Ship-owner withdrawal *R1F2* | 0.5 | 0.55 | 0.18 | 0.27 | 0.09 |

Note: the last item in the table is obtained by the above formula, keeping two decimal places.

Table B6 Index weight set of ship-making supply chain vulnerability（Group2）

| First-level factors | Weight | Second-level factors | Weight | Third-level factors | Weight | Severity weight | Occurrence weight | Detection weight |  |
| --- | --- | --- | --- | --- | --- | --- | --- | --- | --- |
| Plan  *P* | 0.3 | Strategy *P1* | 0.38 | Plan deviation *P1F1* | 0.6 | 0.54 | 0.24 | 0.22 | 0.07 |
| Inconsistent strategic objectives among supply chain members *P1F2* | 0.4 | 0.46 | 0.25 | 0.29 | 0.05 |
| Culture *P2* | 0.16 | Culture difference*P2F1* | 0.42 | 0.4 | 0.30 | 0.3 | 0.02 |
| Low quality of the staff cultural skills *P2F2* | 0.58 | 0.43 | 0.24 | 0.33 | 0.03 |
| Demand *P3* | 0.24 | Customer loss*P3F1* | 0.62 | 0.48 | 0.31 | 0.21 | 0.04 |
| Balance of supply and demand *P3F2* | 0.38 | 0.41 | 0.33 | 0.26 | 0.03 |
| Environment *P4* | 0.22 | Industrial policy constraints *P4F1* | 0.3 | 0.39 | 0.24 | 0.37 | 0.02 |
| Insufficient in public utilities supply *P4F2* | 0.22 | 0.43 | 0.25 | 0.32 | 0.01 |
| Macroeconomic fluctuation *P4F3* | 0.28 | 0.48 | 0.26 | 0.26 | 0.02 |
| Natural disasters etc.*P4F5* | 0.2 | 0.46 | 0.36 | 0.28 | 0.01 |
| Source  *S* | 0.26 | Purchasing *S1* | 0.55 | High purchasing price*S1F1* | 0.46 | 0.43 | 0.39 | 0.18 | 0.07 |
| Low quality of procurement product *S1F2* | 0.54 | 0.48 | 0.24 | 0.28 | 0.08 |
| Supply *S2* | 0.45 | Supplier number *S2F1* | 0.41 | 0.44 | 0.38 | 0.18 | 0.05 |
| Delivery delay *S2F2* | 0.59 | 0.36 | 0.38 | 0.26 | 0.07 |
| Make  *M* | 0.16 | Production *M1* | 0.6 | Improper control of the production process *M1F1* | 0.43 | 0.48 | 0.31 | 0.21 | 0.04 |
| Technical level restrictions *M1F2* | 0.33 | 0.41 | 0.31 | 0.28 | 0.03 |
| Excess capacity *M1F3* | 0.24 | 0.41 | 0.35 | 0.24 | 0.02 |
| Control *M2* | 0.4 | Labor cost Rising  *M2F1* | 0.48 | 0.47 | 0.34 | 0.19 | 0.03 |
| Excessive target node *M2F2* | 0.26 | 0.43 | 0.31 | 0.26 | 0.02 |
| Imperfect job security system *M2F3* | 0.26 | 0.39 | 0.26 | 0.35 | 0.02 |
| Deliver  *D* | 0.14 | Relation *D1* | 0.4 | Self-interested behavior of partners *D1F1* | 0.52 | 0.45 | 0.19 | 0.36 | 0.03 |
| Inequitable benefits distribution among partners *D1F2* | 0.48 | 0.48 | 0.25 | 0.27 | 0.03 |
| Trading *D2* | 0.6 | Delivery tardiness *D2F1* | 0.39 | 0.54 | 0.16 | 0.3 | 0.03 |
| Performance risk *D2F2* | 0.31 | 0.5 | 0.19 | 0.31 | 0.03 |
| Changes in ship price *D2F3* | 0.30 | 0.43 | 0.3 | 0.37 | 0.03 |
| Return  *R* | 0.14 | Return management*R1* | 1 | Contract renegotiation *R1F1* | 0.46 | 0.49 | 0.22 | 0.29 | 0.06 |
| Ship-owner withdrawal *R1F2* | 0.54 | 0.48 | 0.29 | 0.23 | 0.08 |

**Appendix C：Calculation data of other methods**

Table C1 Raw data of average scoring method

| Factors | *S* | | | | | *O* | | | | | *D* | | | | |
| --- | --- | --- | --- | --- | --- | --- | --- | --- | --- | --- | --- | --- | --- | --- | --- |
| 1 | 2 | 3 | 4 | 5 | 1 | 2 | 3 | 4 | 5 | 1 | 2 | 3 | 4 | 5 |
| *P1F1* | *10* | *7.14* | *2.86* | *10* | *1.43* | *1.43* | *4.29* | *2.86* | *4.29* | *5.71* | *2.86* | *2.86* | *8.57* | *10* | *4.29* |
| *P1F2* | *8.57* | *5.71* | *5.71* | *8.57* | *5.71* | *2.86* | *4.29* | *8.57* | *5.71* | *5.71* | *4.29* | *1.43* | *10* | *8.57* | *8.57* |
| *P2F1* | *7.14* | *8.57* | *8.57* | *7.14* | *1.43* | *5.71* | *5.71* | *5.71* | *5.71* | *1.43* | *2.86* | *2.86* | *10* | *2.86* | *1.43* |
| *P2F2* | *5.71* | *5.71* | *2.86* | *4.29* | *7.14* | *5.71* | *4.29* | *2.86* | *8.57* | *10* | *2.86* | *4.29* | *2.86* | *7.14* | *4.29* |
| *P3F1* | *8.57* | *5.71* | *8.57* | *8.57* | *8.57* | *8.57* | *7.14* | *8.57* | *7.14* | *5.71* | *1.43* | *2.86* | *2.86* | *5.71* | *1.43* |
| *P3F2* | *4.29* | *2.86* | *8.57* | *8.57* | *8.57* | *5.71* | *4.29* | *8.57* | *8.57* | *8.57* | *2.86* | *4.29* | *2.86* | *8.57* | *1.43* |
| *P4F1* | *2.86* | *8.57* | *10* | *7.14* | *1.43* | *5.71* | *2.86* | *8.57* | *7.14* | *1.43* | *5.71* | *2.86* | *2.86* | *5.71* | *1.43* |
| *P4F2* | *2.86* | *4.29* | *8.57* | *5.71* | *4.29* | *5.71* | *4.29* | *8.57* | *7.14* | *8.57* | *5.71* | *7.14* | *2.86* | *5.71* | *2.86* |
| *P4F3* | *5.71* | *8.57* | *8.57* | *7.14* | *10* | *2.86* | *7.14* | *8.57* | *7.14* | *1.43* | *2.86* | *2.86* | *8.57* | *7.14* | *4.29* |
| *P4F4* | *2.86* | *8.57* | *5.71* | *8.57* | *1.43* | *2.86* | *10* | *5.71* | *2.86* | *1.43* | *1.43* | *1.43* | *8.57* | *2.86* | *1.43* |
| *S1F1* | *2.86* | *7.14* | *8.57* | *7.14* | *7.14* | *2.86* | *8.57* | *8.57* | *2.86* | *10* | *2.86* | *4.29* | *10* | *4.29* | *1.43* |
| *S1F2* | *5.71* | *5.71* | *5.71* | *7.14* | *10* | *4.29* | *4.29* | *5.71* | *4.29* | *10* | *5.71* | *2.86* | *5.71* | *4.29* | *1.43* |
| *S2F1* | *2.86* | *7.14* | *8.57* | *7.14* | *5.71* | *4.29* | *5.71* | *8.57* | *7.14* | *2.86* | *2.86* | *5.71* | *8.57* | *7.14* | *4.29* |
| *S2F2* | *4.29* | *8.57* | *8.57* | *7.14* | *4.29* | *2.86* | *7.14* | *7.14* | *4.29* | *5.71* | *2.86* | *2.86* | *2.86* | *7.14* | *10* |
| *M1F1* | *5.71* | *7.14* | *10* | *7.14* | *10* | *5.71* | *5.71* | *7.14* | *8.57* | *10* | *5.71* | *5.71* | *7.14* | *7.14* | *1.43* |
| *M1F2* | *2.86* | *7.14* | *10* | *8.57* | *10* | *5.71* | *4.29* | *10* | *2.86* | *10* | *5.71* | *5.71* | *1.43* | *7.14* | *2.86* |
| *M1F3* | *8.57* | *8.57* | *10* | *7.14* | *10* | *5.71* | *10* | *10* | *4.29* | *10* | *2.86* | *1.43* | *10* | *4.29* | *2.86* |
| *M2F1* | *8.57* | *10* | *8.57* | *7.14* | *7.14* | *8.57* | *7.14* | *5.71* | *4.29* | *1.43* | *2.86* | *2.86* | *2.86* | *2.86* | *1.43* |
| *M2F2* | *5.71* | *8.57* | *8.57* | *4.29* | *10* | *5.71* | *5.71* | *5.71* | *7.14* | *10* | *2.86* | *2.86* | *5.71* | *7.14* | *1.43* |
| *M2F3* | *2.86* | *2.86* | *8.57* | *4.29* | *10* | *8.57* | *7.14* | *8.57* | *5.71* | *10* | *5.71* | *2.86* | *5.71* | *8.57* | *4.29* |
| *D1F1* | *5.71* | *1.43* | *2.86* | *5.71* | *10* | *10* | *2.86* | *2.86* | *8.57* | *8.57* | *8.57* | *8.57* | *8.57* | *5.71* | *10* |
| *D1F2* | *2.86* | *7.14* | *8.57* | *5.71* | *4.29* | *10* | *7.14* | *2.86* | *7.14* | *10* | *8.57* | *5.71* | *8.57* | *4.29* | *1.43* |
| *D2F1* | *5.71* | *8.57* | *8.57* | *8.57* | *8.57* | *5.71* | *7.14* | *8.57* | *4.29* | *4.29* | *2.86* | *2.86* | *8.57* | *4.29* | *7.14* |
| *D2F2* | *5.71* | *4.29* | *2.86* | *8.57* | *2.86* | *2.86* | *5.71* | *1.43* | *4.29* | *5.71* | *10* | *1.43* | *2.86* | *4.29* | *1.43* |
| *D2F3* | *2.86* | *2.86* | *2.86* | *8.57* | *1.43* | *8.57* | *4.29* | *2.86* | *4.29* | *7.14* | *2.86* | *2.86* | *2.86* | *2.86* | *5.71* |
| *R1F1* | *5.71* | *2.86* | *2.86* | *8.57* | *7.14* | *5.71* | *1.43* | *2.86* | *2.86* | *2.86* | *10* | *1.43* | *8.57* | *2.86* | *2.86* |
| *R1F2* | *10* | *8.57* | *2.86* | *8.57* | *10* | *5.71* | *5.71* | *2.86* | *2.86* | *1.43* | *8.57* | *2.86* | *8.57* | *2.86* | *1.43* |

Table C2 Only fuzzy theory FMEA method

| Factors |  | Severity weight | Severity | Occurrence weight | Occurrence | Detection weight | Detection |
| --- | --- | --- | --- | --- | --- | --- | --- |
|
| *P1F1* | 0.04 | 0.53 | 6.9 | 0.15 | 3.2 | 0.32 | 5.4 |
| *P1F2* | 0.03 | 0.21 | 7.4 | 0.39 | 5.1 | 0.4 | 6.3 |
| *P2F1* | 0.02 | 0.41 | 7.2 | 0.34 | 5.3 | 0.25 | 3.7 |
| *P2F2* | 0.02 | 0.24 | 4.9 | 0.45 | 5.9 | 0.31 | 3.9 |
| *P3F1* | 0.02 | 0.42 | 8.3 | 0.45 | 7.8 | 0.13 | 2.6 |
| *P3F2* | 0.02 | 0.47 | 6.3 | 0.4 | 7.1 | 0.13 | 4 |
| *P4F1* | 0.02 | 0.34 | 6 | 0.42 | 5.5 | 0.24 | 3.9 |
| *P4F2* | 0.01 | 0.48 | 5 | 0.32 | 6.7 | 0.2 | 4.9 |
| *P4F3* | 0.01 | 0.46 | 7.7 | 0.25 | 5.4 | 0.29 | 4.8 |
| *P4F4* | 0.01 | 0.77 | 5.6 | 0.14 | 4.4 | 0.19 | 3 |
| *S1F1* | 0.07 | 0.43 | 5.9 | 0.44 | 5.7 | 0.13 | 4.6 |
| *S1F2* | 0.05 | 0.5 | 6.4 | 0.41 | 5.3 | 0.09 | 4.3 |
| *S2F1* | 0.08 | 0.43 | 5.8 | 0.32 | 5.9 | 0.25 | 5.5 |
| *S2F2* | 0.04 | 0.52 | 6.8 | 0.34 | 4.9 | 0.14 | 4 |
| *M1F1* | 0.06 | 0.35 | 7.4 | 0.35 | 7 | 0.3 | 5.7 |
| *M1F2* | 0.06 | 0.35 | 6.8 | 0.32 | 6 | 0.33 | 4.7 |
| *M1F3* | 0.06 | 0.42 | 8.8 | 0.3 | 7.5 | 0.28 | 4 |
| *M2F1* | 0.05 | 0.44 | 8.5 | 0.37 | 6.3 | 0.19 | 2.2 |
| *M2F2* | 0.04 | 0.35 | 7.2 | 0.41 | 6.4 | 0.24 | 3.8 |
| *M2F3* | 0.03 | 0.41 | 4.8 | 0.26 | 8 | 0.33 | 5.6 |
| *D1F1* | 0.02 | 0.34 | 4.6 | 0.32 | 6.6 | 0.34 | 8.4 |
| *D1F2* | 0.03 | 0.31 | 5.5 | 0.4 | 7.1 | 0.29 | 6.7 |
| *D2F1* | 0.02 | 0.3 | 8 | 0.39 | 6.2 | 0.31 | 4.5 |
| *D2F2* | 0.01 | 0.41 | 5.1 | 0.33 | 3.6 | 0.26 | 4.7 |
| *D2F3* | 0.02 | 0.45 | 3.5 | 0.37 | 5.7 | 0.18 | 2.6 |
| *R1F1* | 0.09 | 0.34 | 5.1 | 0.3 | 3.1 | 0.36 | 5.7 |
| *R1F2* | 0.09 | 0.65 | 8 | 0.18 | 3.9 | 0.27 | 5.6 |
